# Supplementary material
Source: PubMed Central journal article supplement (PMC3077421)

**Supplementary Information**  
**For *Nature Biotechnology* Letter**

**A Non-human Sialic Acid on Recombinant Glycosylated Biotherapeutic Products:  
Implications for Immunogenicity and Efficacy, and a Proposed Solution**

Darius Ghaderi, Rachel E. Taylor, Vered Padler-Karavani,  
Sandra Diaz, and Ajit Varki.

**Supplementary Table 1. Sialic acids on Cetuximab and Panitumumab**

| Antibody    | Total sialic acid<br>(mol/mol antibody) | % Neu5Gc | Neu5Gc Content<br>(mol/mol antibody). |
|-------------|-----------------------------------------|----------|---------------------------------------|
| Cetuximab   | 1.84                                    | 95.5     | 1.77                                  |
| Panitumumab | 0.22                                    | <0.1     | <0.1                                  |
| Murine IgG  | 0.50                                    | >99.9    | 0.50                                  |

Bound sialic acids were released by mild acid, derivatized with 1,2-diamino-4,5-methyl dioxymethylene (DMB), and analyzed by HPLC as described in Methods.

**Supplementary Table 2. Neu5Gc Content of Some Biotherapeutic Agents**

| <b>Therapeutic Agent</b>                      | <b>Company</b>                                   | <b>Cell line*</b> | <b>Neu5Gc content (mol/mol)**</b> |
|-----------------------------------------------|--------------------------------------------------|-------------------|-----------------------------------|
| <b>Alemtuzumab</b><br>Campath®<br>Mabcampath® | Genzyme Corp.                                    | CHO               | 0.001                             |
| <b>Bevacizumab</b><br>Avastin®                | Genentech Inc.                                   | CHO               | 0.001                             |
| <b>Cetuximab</b><br>Erbix®                    | Merck & Co., Inc.<br>ImClone Systems Inc.        | Sp2/0             | 1.77                              |
| <b>Daclizumab</b><br>Zenapax®                 | F. Hoffmann-La Roche Ltd.                        | Sp2/0             | 0.081                             |
| <b>Erythropoietin</b><br>Procrit®             | Amgen                                            | CHO               | 0.014                             |
| <b>Panitumumab</b><br>Vectibix®               | Amgen                                            | CHO               | <0.001                            |
| <b>Rituximab</b><br>Rituxan®<br>Mabthera®     | Genentech Inc                                    | CHO               | 0.01                              |
| <b>Trastuzumab</b><br>Herceptin®              | F. Hoffmann-La Roche Ltd.<br>Genentech Inc. (US) | CHO               | 0.005                             |

Information regarding therapeutic agents, companies and cell lines were obtained by searching publicly accessible and/or official web sites

\* CHO, Chinese Hamster Ovary cells; Sp2/0, murine myeloma cells.

\*\*Samples were subjected to base treatment with 0.1 M NaOH (final) at 37°C for 30 min to remove any O-acetyl esters, and the sialic acids were then released by acid hydrolysis with 2 M acetic acid (final), at 80°C for 3 hrs. Samples were filtered, derivatized with 1,2-diamino-4,5-methyl dioxybenzene (DMB), and analyzed by HPLC. Measured values of non acid-treated controls (free sialic acids) were subtracted.

**Supplementary Table 3. Overview of FDA-approved Biotherapeutic Agents, Likely Glycosylation Status, and Sources**

| Type of Agent         | Glycosylated (%) | Source (Number of products) |       |     |                    |     |                 |              |      |                                    |
|-----------------------|------------------|-----------------------------|-------|-----|--------------------|-----|-----------------|--------------|------|------------------------------------|
|                       |                  | <i>E. Coli</i> *            | Yeast | CHO | Hybridoma /Myeloma | BHK | HEK293/ HT-1080 | Animal Serum | Milk | Others                             |
| Monoclonal Antibodies | 92% (24/26)      | 2                           |       | 11  | 10                 |     |                 |              |      | Murine ascites                     |
| Fc-Fusion Proteins    | 80 % (4/5)       | 1                           |       | 4   |                    |     |                 |              |      |                                    |
| Hormones              | 33 % (7/21)      | 7                           | 3     | 6   |                    |     |                 |              |      | Pig, Murine cell line (mouse C127) |
| Cytokines             | 26 % (5/19)      | 14                          |       | 5   |                    |     |                 |              |      |                                    |
| Clotting Factors      | 100 % (8/8)      |                             |       | 4   |                    | 3   | 1               |              |      |                                    |
| Enzymes               | 81 % (13/16)     | 2*                          | 1     | 9   |                    |     | 1               |              |      | Sheep, Bovine, Pig                 |
| Anti-Sera             | 100 % (4/4)      |                             |       |     |                    |     |                 | 4            |      |                                    |
| Enzyme inhibitor      | 100 % (1/1)      |                             |       |     |                    |     |                 |              | 1    |                                    |

Information regarding common FDA-approved biotherapeutic agents and sources was obtained by searching publicly accessible web sites only, as of April 2010. The list is not meant to be comprehensive nor can its accuracy be guaranteed, and it was added at the explicit request of the reviewers and editors.

HEK293, Human Embryonic Kidney cells; HT-1080, human fibrosarcoma cells; CHO, Chinese Hamster Ovary cells; BHK, Baby Hamster Kidney cells; Myeloma/Hybridoma, murine myeloma or hybridoma cells.

\***Xiaflex®** Collagenase is produced in *Clostridium histolyticum*.

Although there are no published studies of the sialic acid types of most of the products listed, it is reasonable to predict the following ascending order of *relative* Neu5Gc content, based on cell-type or source: HEK293 < CHO < BHK < Animal sources < Myeloma/Hybridoma. The *absolute* Neu5Gc content will also depend on the extent of glycosylation and sialylation of a given biotherapeutic agent. Biotherapeutics produced in *E. coli*, *Clostridium histolyticum* and yeast should not carry sialic acids.

**Supplementary Table 4. Details of Examples of FDA-approved Biotherapeutic Agents, Cell Sources for Production and Likely Glycosylation Status of the Agents**

| <b>Agent</b>                                              | <b>Marketing Company</b>                                           | <b>Glycoprotein (Yes/No)</b> | <b>Production Source*</b>    |
|-----------------------------------------------------------|--------------------------------------------------------------------|------------------------------|------------------------------|
| <b><u>Monoclonal Antibodies</u></b>                       |                                                                    |                              |                              |
| <b>Actemra®</b><br>Tocilizumab                            | Genentech Inc.,<br>Hoffmann-La Roche<br>Ltd.                       | Yes                          | CHO cells                    |
| <b>Avastin®</b><br>Bevacizumab                            | Genentech Inc.,<br>Hoffmann-La Roche<br>Ltd.                       | Yes                          | CHO cells                    |
| <b>Campath® (US),<br/>Mabcampath® (EU)</b><br>Alemtuzumab | Genzyme Corp.                                                      | Yes                          | CHO cells                    |
| <b>Herceptin®</b><br>Trastuzumab                          | F. Hoffmann-La<br>Roche Ltd,<br>Genentech Inc.                     | Yes                          | CHO cells                    |
| <b>Humira®</b><br>Adalimumab                              | Abbott Laboratories                                                | Yes                          | CHO cells                    |
| <b>Rituxan®</b><br>Rituximab                              | Genentech Inc,<br>Biogen Idec                                      | Yes                          | CHO cells                    |
| <b>Simponi®</b><br>Golimumab                              | Centocor Ortho<br>Biotech Inc., Merck &<br>Co                      | Yes                          | CHO cells                    |
| <b>Stelara™</b><br>Ustekinumab                            | Centocor Ortho<br>Biotech Inc.                                     | Yes                          | CHO cells                    |
| <b>Vectibix®</b><br>Panitumumab                           | Amgen                                                              | Yes                          | CHO cells                    |
| <b>Xolair®</b><br>Omalizumab                              | Genentech Inc.,<br>Novartis<br>Pharmaceuticals Corp.<br>Tanox Inc. | Yes                          | CHO cells                    |
| <b>Zevalin®</b><br>Ibritumomab tiuxetan                   | Biogen Idec., Bayer<br>Schering Pharma AG                          | Yes                          | CHO cells                    |
| <b>Cimzia®</b><br>Certolizumab pegol                      | UCB                                                                | No<br>(PEGylated)            | <i>E. coli</i>               |
| <b>Lucentis®</b><br>Ranibizumab)                          | Genentech Inc.,<br>Novartis<br>Pharmaceuticals Corp.               | No                           | <i>E. coli</i>               |
| <b>Bexxar®</b><br>Tositumomab-I131                        | GlaxoSmithKline                                                    | Yes                          | Hybridoma,<br>mammalian      |
| <b>Orthoclone Okt3®</b><br>Muromonab-CD3                  | Centocor Ortho<br>Biotech Inc.                                     | Yes                          | Murine ascites,<br>hybridoma |
| <b>Soliris®</b>                                           | Alexion                                                            | Yes                          | Murine myeloma               |

|                                           |                                                                         |     |                                                   |
|-------------------------------------------|-------------------------------------------------------------------------|-----|---------------------------------------------------|
| Eculizumab                                | Pharmaceuticals, Inc                                                    |     | cell line                                         |
| <b>Ilaris®</b><br>Canakinumab             | Novartis<br>Pharmaceuticals Corp.                                       | Yes | Murine Sp2/0-Ag14<br>fused hybridoma<br>cell line |
| <b>Mylotarg®</b><br>Gemtuzumab ozogamicin | Wyeth<br>Pharmaceuticals                                                | Yes | NS0 mouse<br>myeloma cells                        |
| <b>Arzerra®</b><br>Ofatumumab             | GlaxoSmithKline                                                         | Yes | NS0 mouse<br>myeloma cells                        |
| <b>Synagis®</b><br>Palivizumab            | Abbott Laboratories,<br>MedImmune Inc.                                  | Yes | NS0 mouse<br>myeloma cells                        |
| <b>Tysabri®</b><br>Natalizumab            | Élan Pharmaceuticals,<br>Biogen Idec.                                   | Yes | NS0 mouse<br>myeloma cells                        |
| <b>Erbix®</b><br>Cetuximab                | ImClone Systems<br>Merck & Co., Inc.,<br>Bristol-Myers Squibb           | Yes | Sp2/0 mouse<br>myeloma cells                      |
| <b>Remicade®</b><br>Infliximab            | Centocor Ortho<br>Biotech Inc.                                          | Yes | Sp2/0 mouse<br>myeloma cells                      |
| <b>Reopro®</b><br>Abciximab               | Centocor Ortho<br>Biotech Inc.,<br>Eli Lilly & Co.                      | Yes | Sp2/0 mouse<br>myeloma cells                      |
| <b>Simulect®</b><br>Basiliximab           | Novartis<br>Pharmaceuticals Corp.                                       | Yes | Sp2/0 mouse<br>myeloma cells                      |
| <b>Zenapax®</b><br>Daclizumab             | F. Hoffmann-La<br>Roche Ltd., PDL<br>(Protein Design Labs)<br>BioPharma | Yes | Sp2/0 mouse<br>myeloma cells                      |
| <b><u>Fc-Fusion Proteins</u></b>          |                                                                         |     |                                                   |
| <b>Amevive®</b><br>Alefcept               | Astellas Pharma Inc.                                                    | Yes | CHO cells                                         |
| <b>Arcalyst®</b><br>Rilonacept            | Regeneron<br>Pharmaceuticals Inc.                                       | Yes | CHO cells                                         |
| <b>Enbrel®</b><br>Etanercept              | Amgen, Wyeth<br>Pharmaceutical                                          | Yes | CHO cells                                         |
| <b>Orencia®</b><br>Abatacept              | Bristol-Myers-Squibb                                                    | Yes | CHO cells                                         |
| <b>Nplate®</b><br>Romiplostim             | Amgen                                                                   | No  | <i>E. coli</i>                                    |
| <b><u>Hormones</u></b>                    |                                                                         |     |                                                   |
| <b>Follistim®</b><br>Follitropin beta     | Merck & Co                                                              | Yes | CHO cells                                         |
| <b>Gonal-F®</b><br>Follitropin alfa       | EMD Serono, Inc.                                                        | Yes | CHO cells                                         |
| <b>Luveris®</b>                           | EMD Serono, Inc.                                                        | Yes | CHO cells                                         |

|                                                                 |                                         |     |                                             |
|-----------------------------------------------------------------|-----------------------------------------|-----|---------------------------------------------|
| <u>Luteinizing hormone</u>                                      |                                         |     |                                             |
| <b>OP-1 Putty</b><br>Osteogenic Protein-1<br>(BMP-7)            | Stryker Biotech                         | Yes | CHO cells                                   |
| <b>Ovidrel®</b><br>Choriogonadotropin $\alpha$                  | EMD Serono, Inc.                        | Yes | CHO cells                                   |
| <b>Thyrogen®</b><br>Thyrotropin alfa                            | Genzyme Corp                            | Yes | CHO cells                                   |
| <b>Byetta®</b>                                                  | Eli Lilly & Co.,<br>Amylin              | No  | <i>E. coli</i>                              |
| <b>Genotropin®</b><br>Somatropin                                | Pfizer, Inc.                            | No  | <i>E. coli</i>                              |
| <b>Humalog®</b>                                                 | Eli Lilly & Co.                         | No  | <i>E. coli</i>                              |
| <b>Humanotrope®</b><br>Somatropin                               | Eli Lilly & Co                          | No  | <i>E. coli</i>                              |
| <b>Humatrope®</b><br>Somatropin                                 | Eli Lilly & Co.                         | No  | <i>E. coli</i>                              |
| <b>Humulin®</b>                                                 | Eli Lilly & Co.                         | No  | <i>E. coli</i>                              |
| <b>Kepivance®</b> (palifermin)<br>keratinocyte growth factor    | Biovitrum AB                            | No  | <i>E. coli</i>                              |
| <b>Lantus®</b>                                                  | Sanofi Aventis<br>Pharmaceuticals, Inc. | No  | <i>E. coli</i>                              |
| <b>Norditropin®</b><br>Somatropin                               | Novo Nordisk<br>Pharmaceuticals, Inc.   | No  | <i>E. coli</i>                              |
| <b>Nutropin®</b><br>Somatropin                                  | Genentech Inc                           | No  | <i>E. coli</i>                              |
| <b>Omnitrope®</b><br>Somatropin                                 | Novartis<br>Pharmaceuticals Corp.       | No  | <i>E. coli</i>                              |
| <b>Serostim®, Saizen®,<br/>Zorbtive™</b><br>Somatropin          | EMD Serono, Inc.                        | Yes | Murine cell line<br>(mouse C127)            |
| <b>Emdogain®</b><br>tooth enamel proteins                       | Staumann USA                            | Yes | Pig                                         |
| <b>Novolin®</b> and analogs                                     | Novo Nordisk<br>Pharmaceuticals, Inc.   | No  | <i>Saccharomyces<br/>cerevisiae</i> (yeast) |
| <b>Novolog®, NovoRapid®</b>                                     | Novo Nordisk<br>Pharmaceuticals, Inc.   | No  | <i>Saccharomyces<br/>cerevisiae</i> (yeast) |
| <b>Regranex®</b><br>Platelet-derived growth<br>factor (PDGF)-BB | Johnson & Johnson<br>Co.                | No  | <i>Saccharomyces<br/>cerevisiae</i> (yeast) |
| <u><b>Cytokines</b></u>                                         |                                         |     |                                             |
| <b>Aranesp®</b><br>Darbepoetin alfa                             | Amgen                                   | Yes | CHO cells                                   |
| <b>Avonex®</b>                                                  | Biogen Idec, Inc.                       | Yes | CHO cells                                   |

|                                                                                   |                                       |                |                |
|-----------------------------------------------------------------------------------|---------------------------------------|----------------|----------------|
| <b>Interferon beta-1a</b>                                                         |                                       |                |                |
| <b>NeoRecormon®</b><br>Epoetin beta                                               | Hoffmann-La Roche<br>Ltd.             | Yes            | CHO cells      |
| <b>Procrit® , Epogen®</b><br>Epoetin alfa                                         | Amgen, Centocor<br>Ortho Biotech Inc. | Yes            | CHO cells      |
| <b>Rebif®</b><br>Interferon beta-1a                                               | Pfizer, Inc., EMD<br>Serono, Inc.     | Yes            | CHO cells      |
| <b>Actimmune®</b><br>Interferon gamma-1b                                          | Intermune Inc.                        | No             | <i>E. coli</i> |
| <b>Betaseron®</b><br>Interferon beta-1b                                           | Bayer HealthCare<br>Pharmaceuticals   | No             | <i>E. coli</i> |
| <b>Extavia®</b><br>Interferon beta-1b                                             | Novartis<br>Pharmaceuticals Corp.     | No             | <i>E. coli</i> |
| <b>Infergen®</b><br>Interferon alfacon-1                                          | Three Rivers<br>Pharmaceuticals       | No             | <i>E. coli</i> |
| <b>Intron® A</b><br>Interferon alfa-2b                                            | Merck & Co                            | No             | <i>E. coli</i> |
| <b>Kineret®</b> (anakinra)<br>interleukin-1 receptor<br>antagonist (IL-1Ra)       | Biovitrum AB                          | No             | <i>E. coli</i> |
| <b>Neulasta®</b><br>Pegfilgrastim                                                 | Amgen                                 | No (PEGylated) | <i>E. coli</i> |
| <b>Neumega®</b><br>Des-Pro Interleukin-11                                         | Wyeth<br>Pharmaceuticals              | No             | <i>E. coli</i> |
| <b>Neupogen®</b><br>Recombinant G-CSF                                             | Amgen, Hoffmann-La<br>Roche Ltd.      | No             | <i>E. coli</i> |
| <b>Ontak®</b><br>(denileukin diftitox)<br>IL-2/diphtheria toxin<br>fusion protein | Eisai Co., Ltd.                       | No             | <i>E. coli</i> |
| <b>Pegasys®</b><br>Peginterferon alfa-2a                                          | Hoffmann-La Roche<br>Ltd.             | No (PEGylated) | <i>E. coli</i> |
| <b>Pegintron®</b><br>Peginterferon alfa-2b                                        | Merck & Co                            | No (PEGylated) | <i>E. coli</i> |
| <b>Proleukin®</b><br>Aldesleukin (IL-2)                                           | Novartis<br>Pharmaceuticals Corp.     | No             | <i>E. coli</i> |
| <b>Roferon A®</b><br>Interferon alfa-2a                                           | Hoffmann-La Roche<br>Ltd.             | No             | <i>E. coli</i> |
| <b><u>Clotting Factors</u></b>                                                    |                                       |                |                |
| <b>Helixate FS</b><br>Coagulation factor VIII                                     | ZLB Behring                           | Yes            | BHK cells      |
| <b>Kogenate FS</b><br>Coagulation factor VIII                                     | Bayer Schering Corp.                  | Yes            | BHK cells      |
| <b>NovoSeven®</b> ,                                                               | Novo Nordisk                          | Yes            | BHK cells      |

|                                                                       |                                                                                     |     |                    |
|-----------------------------------------------------------------------|-------------------------------------------------------------------------------------|-----|--------------------|
| <b>Coagulation Factor VIIa</b>                                        |                                                                                     |     |                    |
| <b>Advate®</b><br>Antihemophilic factor                               | Baxter International<br>Inc.                                                        | Yes | CHO cells          |
| <b>BeneFIX®</b><br>Coagulation Factor IX                              | Wyeth<br>Pharmaceuticals                                                            | Yes | CHO cells          |
| <b>ReFacto®</b><br>Antihemophilic Factor                              | Wyeth<br>Pharmaceuticals                                                            | Yes | CHO cells          |
| <b>Xyntha®</b><br>Coagulation factor VIII                             | Wyeth<br>Pharmaceuticals                                                            | Yes | CHO cells          |
| <b>Xigris®</b><br>Drotrecogin alfa<br>(Activated Protein C)           | Eli Lilly & Co.                                                                     | Yes | HEK293             |
| <b><u>Enzyme Inhibitor</u></b>                                        |                                                                                     |     |                    |
| <b>ATryn®</b><br>(Antithrombin/ATIII)                                 | GTC Biotherapeutics                                                                 | Yes | Goat milk          |
| <b><u>Enzymes</u></b>                                                 |                                                                                     |     |                    |
| <b>Amphadase®</b><br>Hyaluronidase (bovine)                           | Amphastar<br>Pharmaceuticals                                                        | Yes | Bovine             |
| <b>Activase®, Cathflo</b><br><b>Activase®, Actilyse®</b><br>Alteplase | Genentech Inc,<br>Boehringer Ingelheim<br>Pharma KG                                 | Yes | CHO cells          |
| <b>Aldurazyme®</b><br>Laronidase                                      | Genzyme Corp                                                                        | Yes | CHO cells          |
| <b>Cerezyme®</b><br>(Imiglucerase)                                    | Genzyme Corp.                                                                       | Yes | CHO cells          |
| <b>Fabrazyme®</b><br>agalsidase-β                                     | Genzyme Corp                                                                        | Yes | CHO cells          |
| <b>Hylenex®, Cumulase®</b><br>Hyaluronidase                           | MediCult A/S,<br>MidAtlantic<br>Diagnostics, Inc.,<br>Halozyme<br>Baxter Healthcare | Yes | CHO cells          |
| <b>Myozyme®</b><br>Alglucosidase alfa                                 | Genzyme Corp                                                                        | Yes | CHO cells          |
| <b>Naglazyme®</b><br>N-acetylgalactosamine<br>4-sulfatase             | BioMarin<br>Pharmaceutical Inc.                                                     | Yes | CHO cells          |
| <b>Pulmozyme®</b><br>Human DNase                                      | Genentech Inc,<br>Hoffmann-La Roche<br>Ltd.                                         | Yes | CHO cells          |
| <b>TNKase®</b><br>Tenecteplase                                        | Genentech Inc                                                                       | Yes | CHO cells          |
| <b>Xiaflex®</b>                                                       | Auxilium                                                                            | No  | <i>Clostridium</i> |



|                                                              |                                         |     |                                         |
|--------------------------------------------------------------|-----------------------------------------|-----|-----------------------------------------|
| Collagenase                                                  | Pharmaceuticals Inc.                    |     | <i>Histolyticum</i>                     |
| <b>Fortical®</b><br>Calcitonin (salmon)                      | Upsher Smith<br>Laboratories            | No  | <i>E. coli</i>                          |
| <b>Elaprase®</b><br>Idursulfase                              | Shire Pharmaceuticals                   | Yes | human cell line (HT-1080)               |
| <b>Pancreaze®</b><br>Pancrelipase                            | Ortho McNeil Janssen                    | Yes | Pig                                     |
| <b>Elitek®</b><br>Rasburicase                                | Sanofi Aventis<br>Pharmaceuticals, Inc. | No  | <i>Saccharomyces cerevisiae</i> (yeast) |
| <b>Vitrase®</b><br>Hyaluronidase (ovine)                     | ISTA Pharmaceuticals                    | Yes | Sheep                                   |
| <b><u>Antisera</u></b>                                       |                                         |     |                                         |
| <b>Atgam®</b><br>Anti-thymocyte globulin                     | Pfizer, Inc.                            | Yes | Equine Serum                            |
| <b>Thymoglobulin®</b><br>Anti-thymocyte globulin             | Genzyme Corp.                           | Yes | Rabbit Serum                            |
| <b>CroFab®</b><br>[Crotalidae Polyvalent Immune Fab (Ovine)] | Savage Laboratories                     | Yes | Sheep Serum                             |
| <b>DigiFab®</b> Digoxin Immune Fab (Ovine)                   | Savage Laboratories                     | Yes | Sheep Serum                             |

Details of information used to generate Supplementary Table 3, with more information regarding common FDA-approved biotherapeutic agents. Information and sources obtained by searching publicly accessible web sites only, as of April 2010. The list is not meant to be comprehensive nor can its accuracy be guaranteed, and it was added at the explicit request of the reviewers and editors.

HEK293, Human embryonic kidney cells; CHO, Chinese Hamster Ovary cells; BHK, Baby Hamster Kidney cells; Myeloma/Hybridoma, murine myeloma or hybridoma cells.

Although there are no published studies of the sialic acid types of most of the products listed, it is reasonable to predict the following ascending order of *relative* Neu5Gc content, based on cell-type or source: HEK293 < CHO < BHK < Animal sources < Myeloma/Hybridoma. The *absolute* Neu5Gc content will also depend on the extent of glycosylation and sialylation of a given biotherapeutic agent. Products produced in *E. coli* and yeast should not carry sialic acids.

**Supplementary Figure 1: SDS-PAGE and Coomassie Staining of Biotherapeutic Antibodies.** 1  $\mu$ g of sialidase treated or untreated Cetuximab (Cet) and Panitumumab (Pan) were separated by SDS-PAGE and Coomassie stained, see Figure 1B, upper panel. The full gel is shown here. The lower bands are light chains.

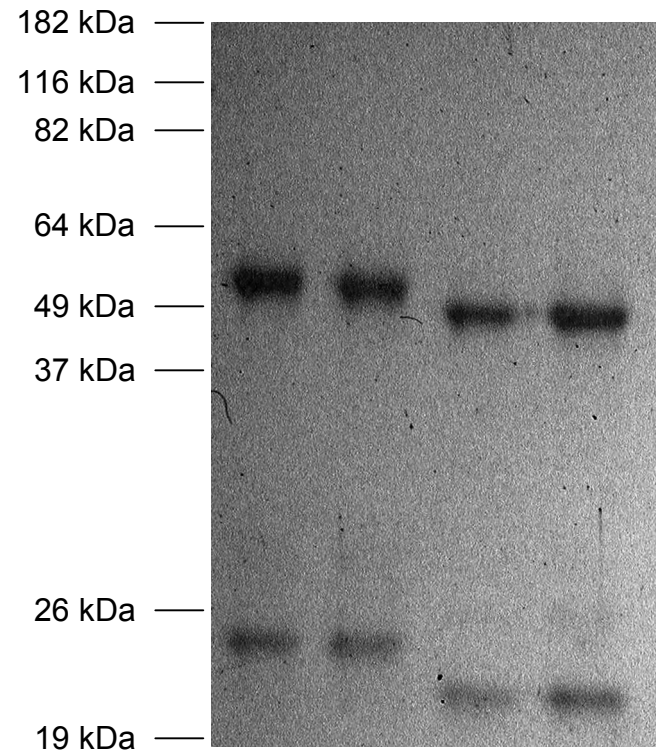

**Supplementary Figure 2: Western-Blot Detection of Neu5Gc on Biotherapeutic Antibodies by Anti-Neu5Gc IgY Antibodies.** 1  $\mu$ g of sialidase treated or untreated Cetuximab (Cet) and Panitumumab (Pan) were separated by SDS-PAGE and blotted. Neu5Gc was detected using an affinity-purified chicken anti-Neu5Gc IgY. For more details, see Figure 1B. Middle Panel. The full gel is shown here.

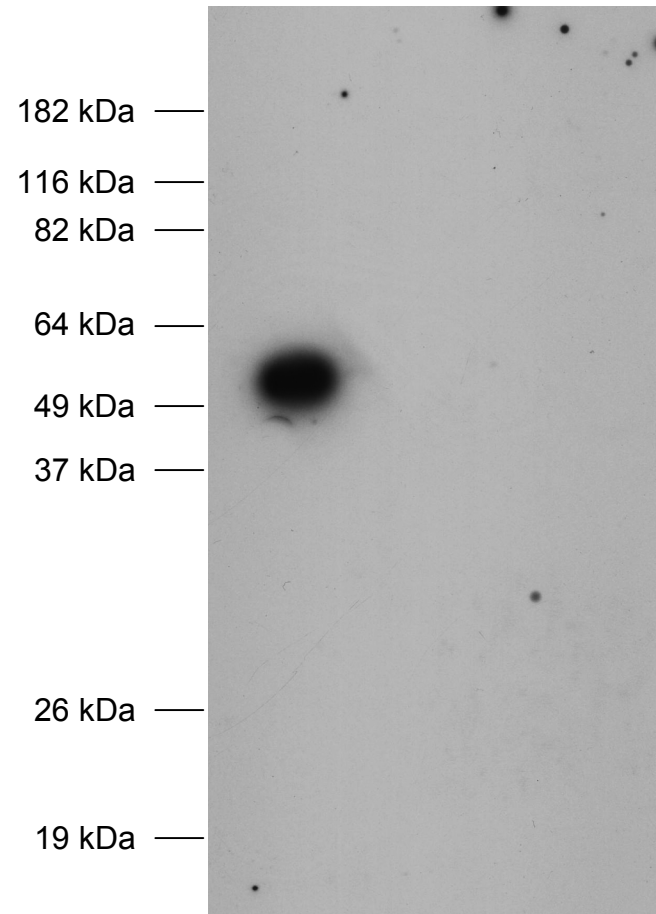

**Supplementary Figure 3: Western-Blot Detection of Neu5Gc on Biotherapeutic Antibodies by Anti-Neu5Gc IgY Antibodies.** 1  $\mu$ g of sialidase treated or untreated Cetuximab (Cet) and Panitumumab (Pan) were separated by SDS-PAGE and blotted. As a control, non-specific IgY was used. For more details, see Figure 1B, lower panel. Full gel is shown here.

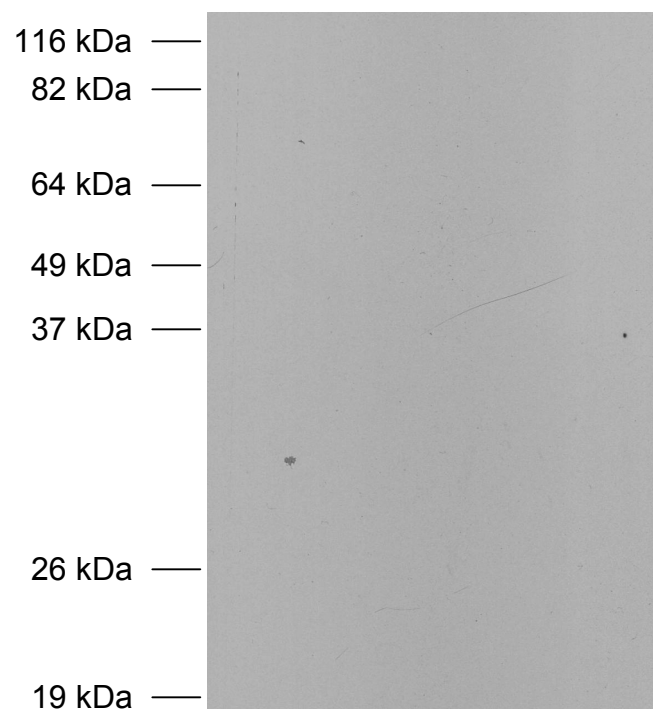

**Supplementary Figure 4: Western-Blot Detection of Neu5Gc on Biotherapeutic Antibodies by IgG Antibodies from Normal Human Serum.** 1  $\mu$ g of sialidase treated or untreated Cetuximab (Cet) and Panitumumab (Pan) were separated by SDS-PAGE and blotted. Neu5Gc was detected using biotinylated human anti-Neu5Gc IgG. For more details, see Figure 1E. Full gel is shown here.

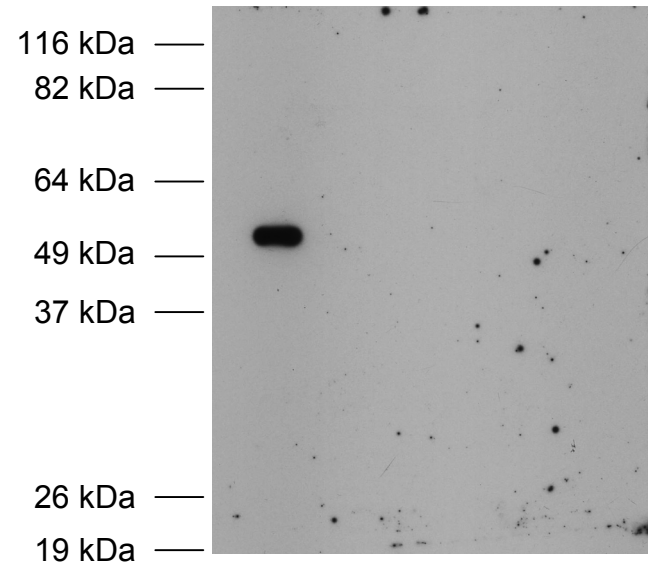

Supplement: NIHMS279253-supplement-Supplementary_Data.pdf [file NIHMS279253-supplement-Supplementary_Data.pdf]
